# Supplementary material for: Evolution of cagA Oncogene of Helicobacter pylori through Recombination
Source: PubMed Central journal article supplement (PMC3154945; doi:10.1371/journal.pone.0023499), 2011-08-11

### A (Major type)

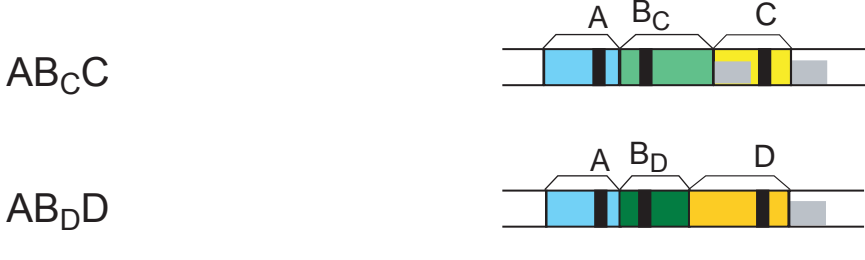

### B (Homologous recombination at CM sequence)

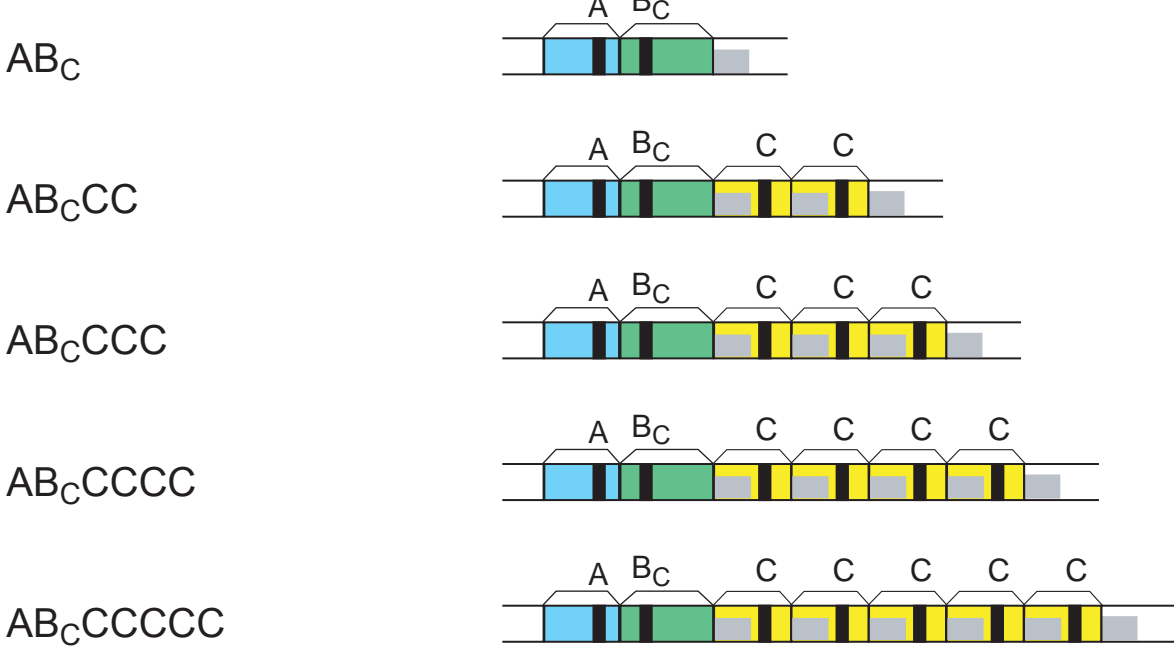

### C (Recombination at EPIYA motif)

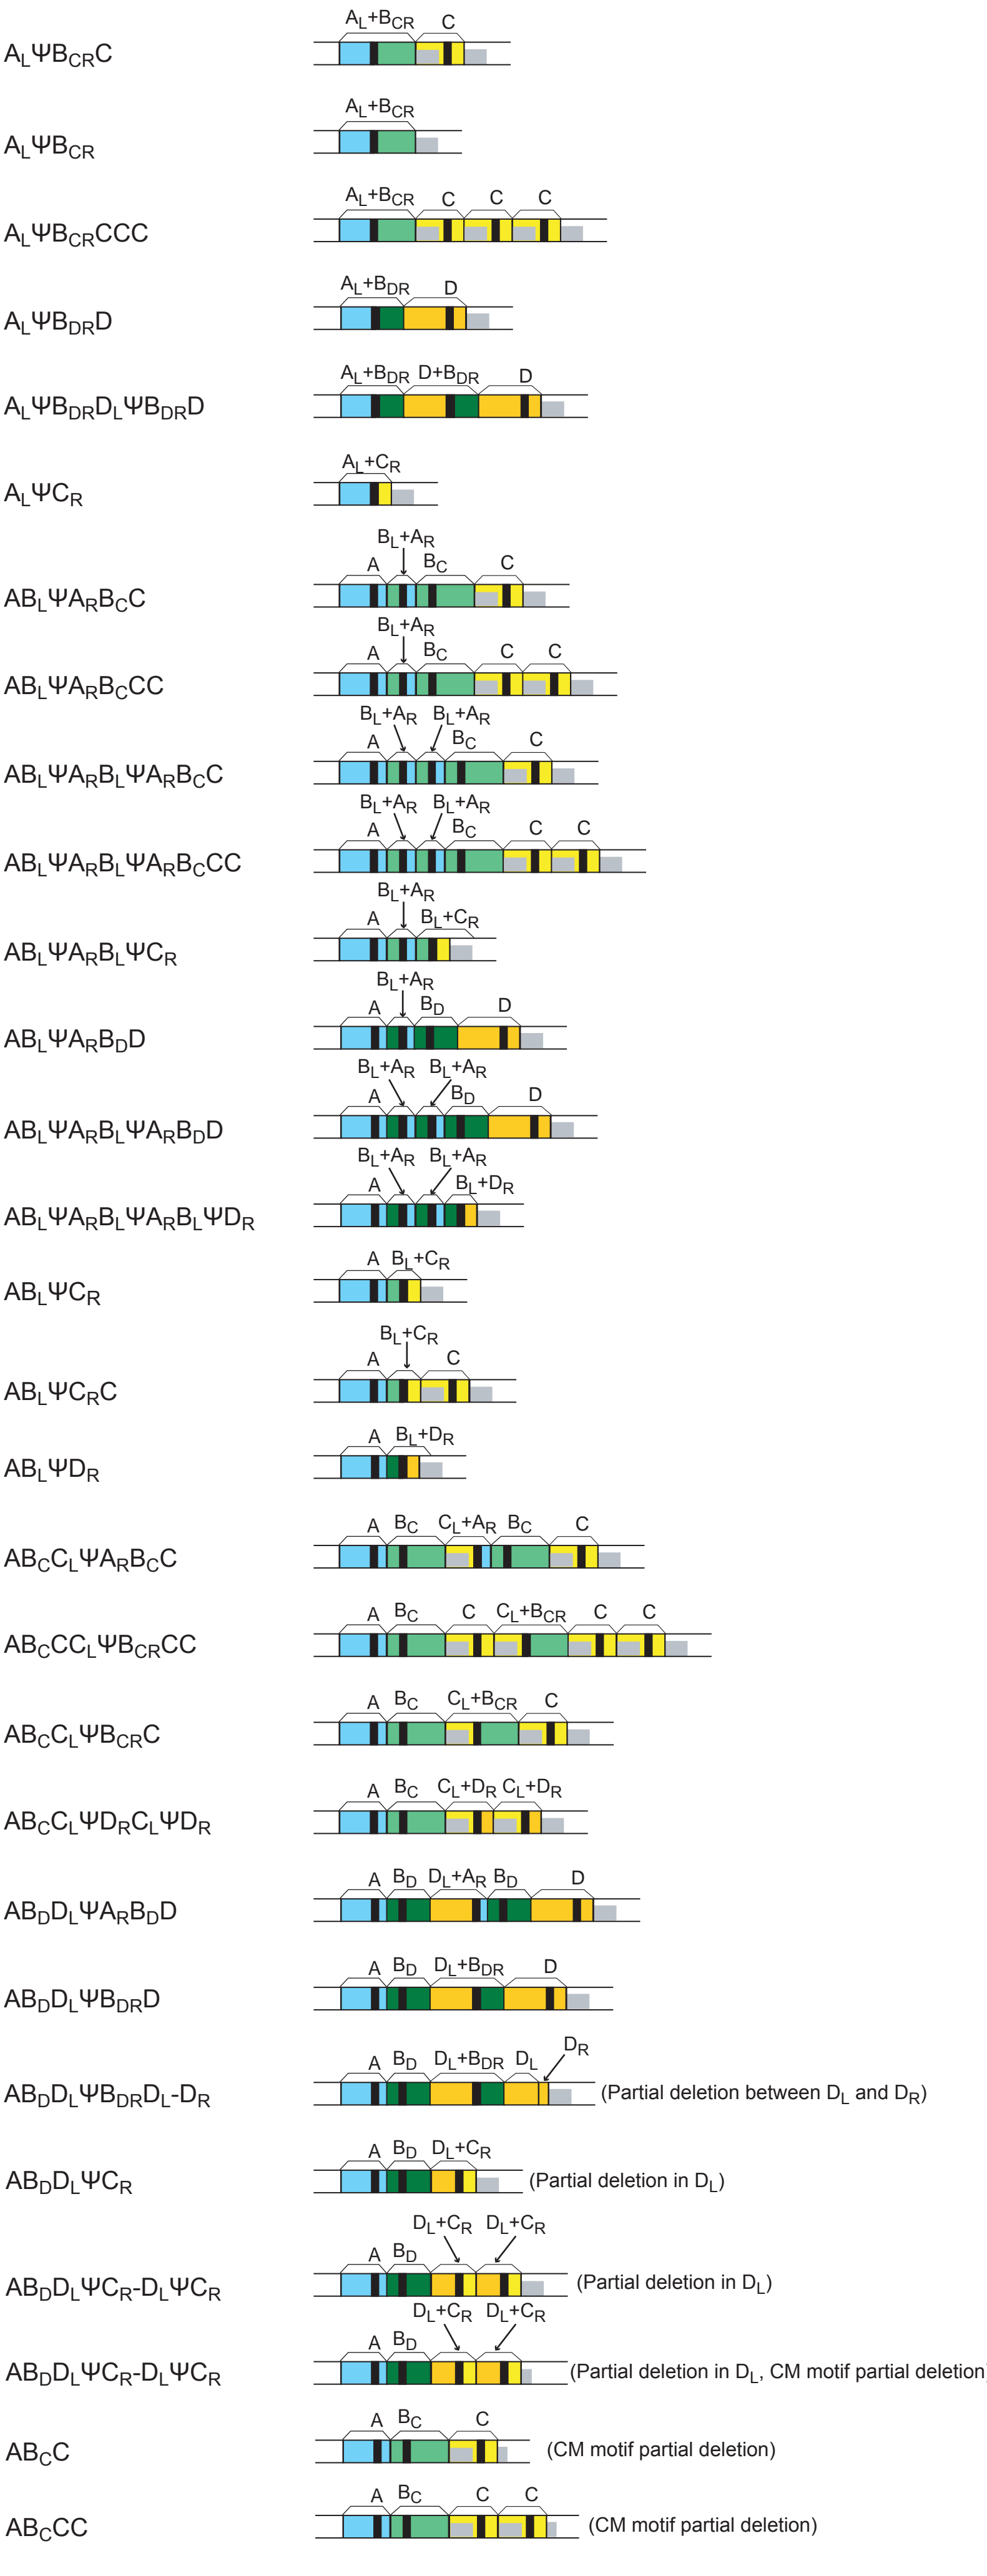

### D (Illegitimate recombination by short sequence identity)

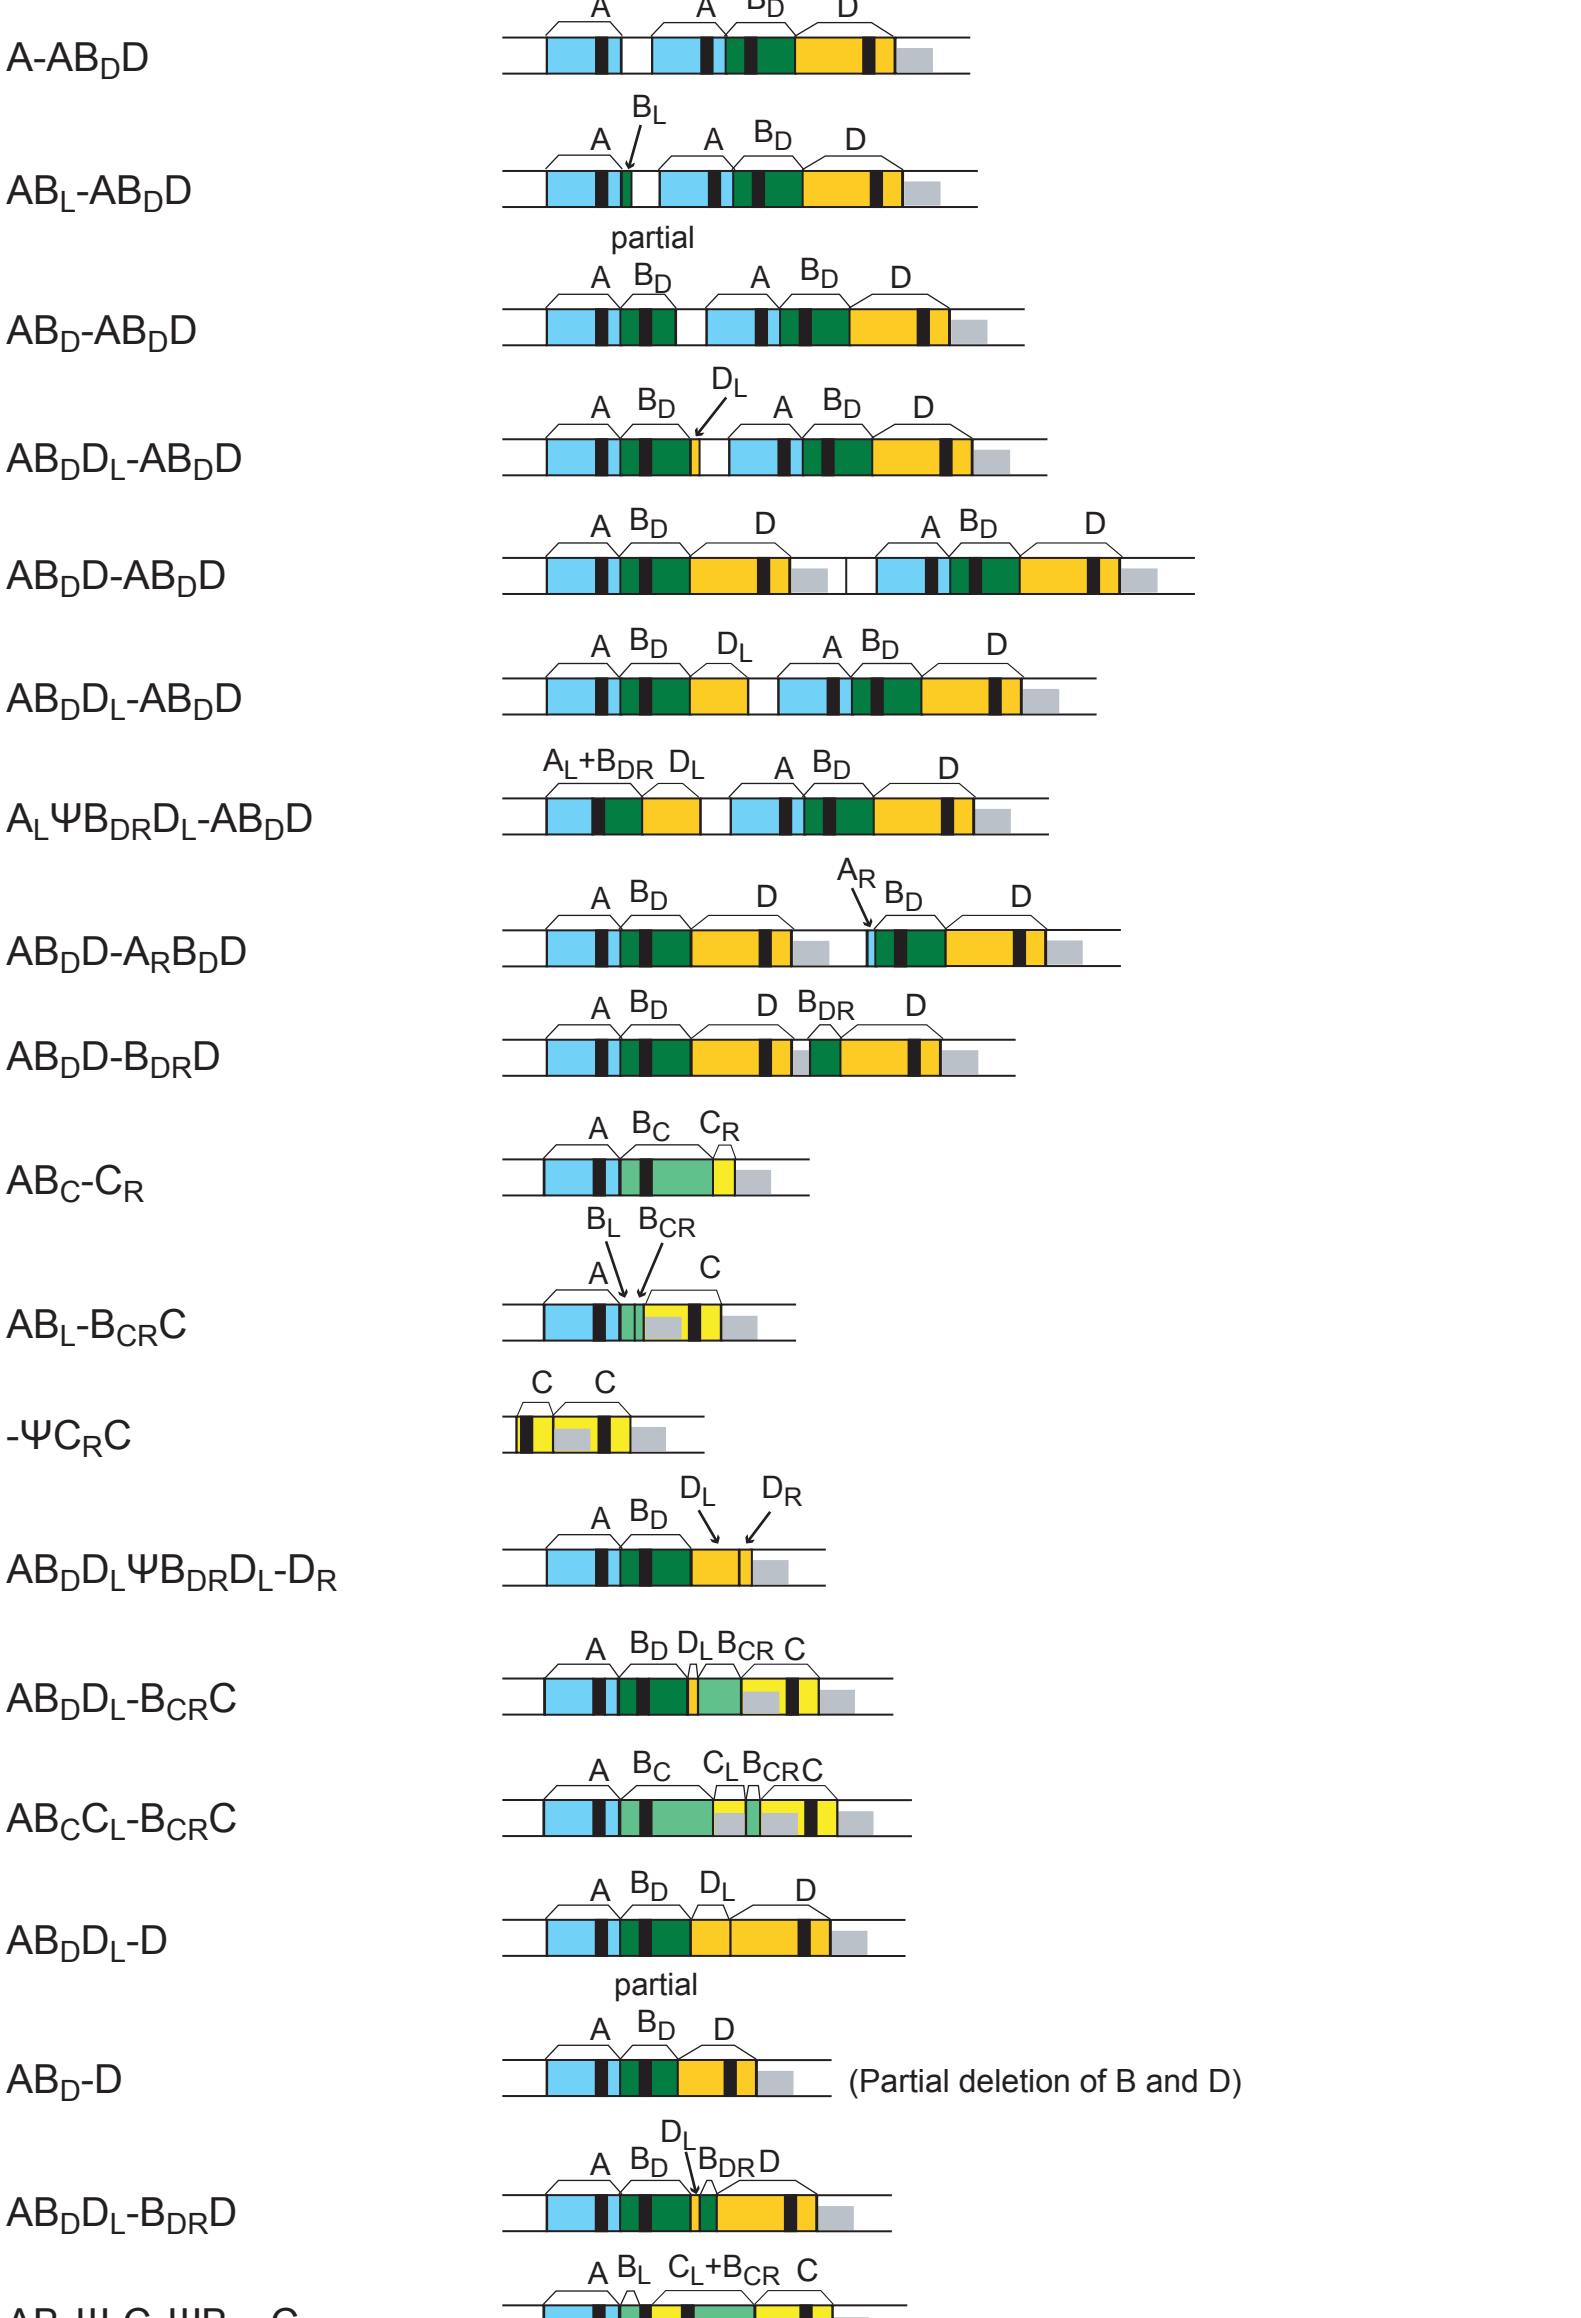

Supplement: pone.0023499.s001.pdf [file pone.0023499.s001.pdf]
