# Supplementary material for: Evolution of cagA Oncogene of Helicobacter pylori through Recombination
Source: PubMed Central journal article supplement (PMC3154945; doi:10.1371/journal.pone.0023499), 2011-08-11

A Left CM

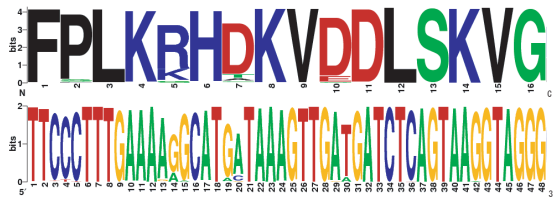

B Right CM

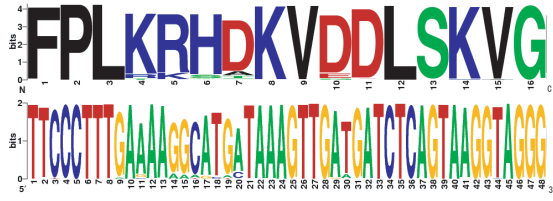

C EPIYA-A (Western)

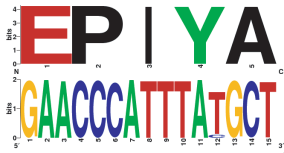

F EPIYA-A (East Asian)

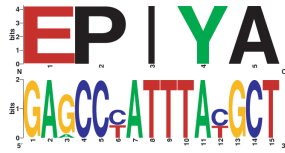

D EPIYA-Bc (Western)

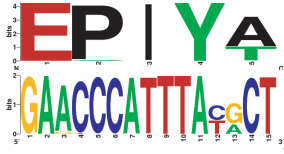

G EPIYA-Bd (East Asian)

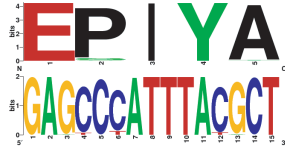

E EPIYA-C (Western)

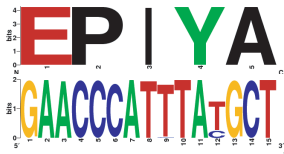

H EPIYA-D (East Asian)

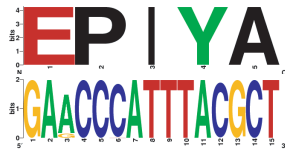

Supplement: pone.0023499.s002.pdf [file pone.0023499.s002.pdf]
