# Supplementary material for: Evolution of cagA Oncogene of Helicobacter pylori through Recombination
Source: PubMed Central journal article supplement (PMC3154945; doi:10.1371/journal.pone.0023499), 2011-08-11

**A**

26695

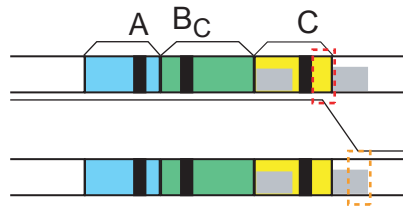

Hpcnic47, Hp93, Hp72,  
259c4, Hp152944,  
Hp140676, PZ5081, v225d

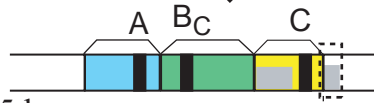

**B** (deletion pattern except for v225d)

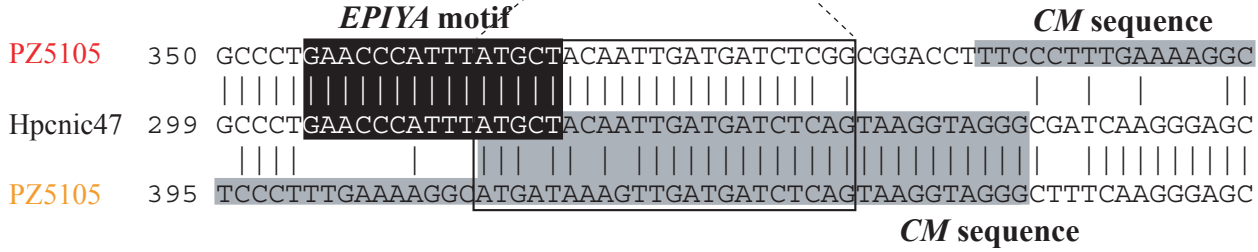

**C** (deletion pattern of v225d)

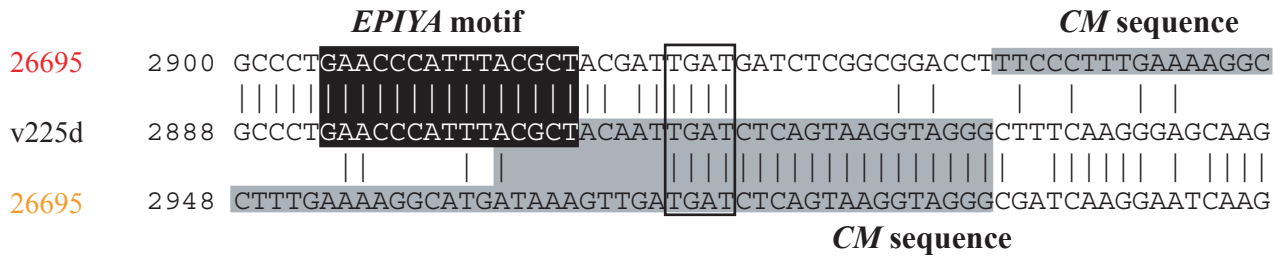

**D**

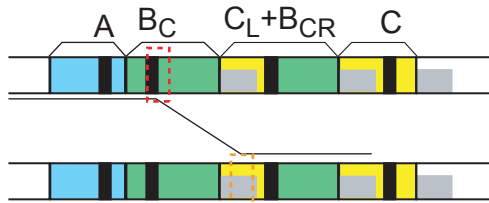

Colombia  
NA1994

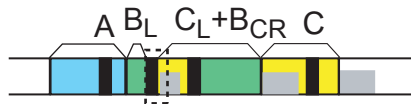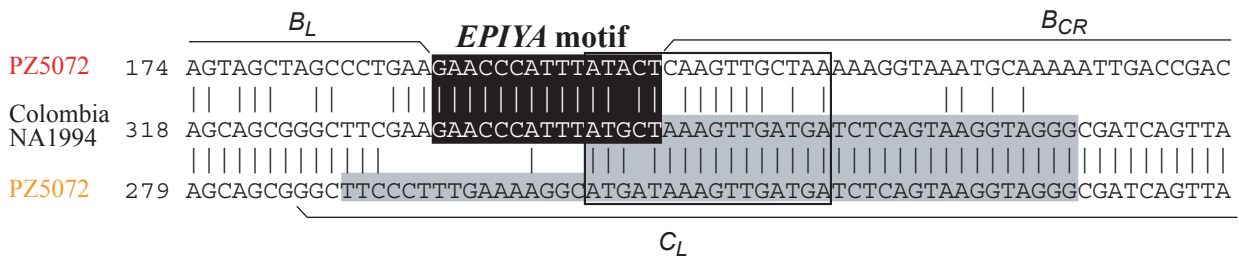

Supplement: pone.0023499.s003.pdf [file pone.0023499.s003.pdf]
