# Supplementary material for: Evolution of cagA Oncogene of Helicobacter pylori through Recombination
Source: PubMed Central journal article supplement (PMC3154945; doi:10.1371/journal.pone.0023499), 2011-08-11

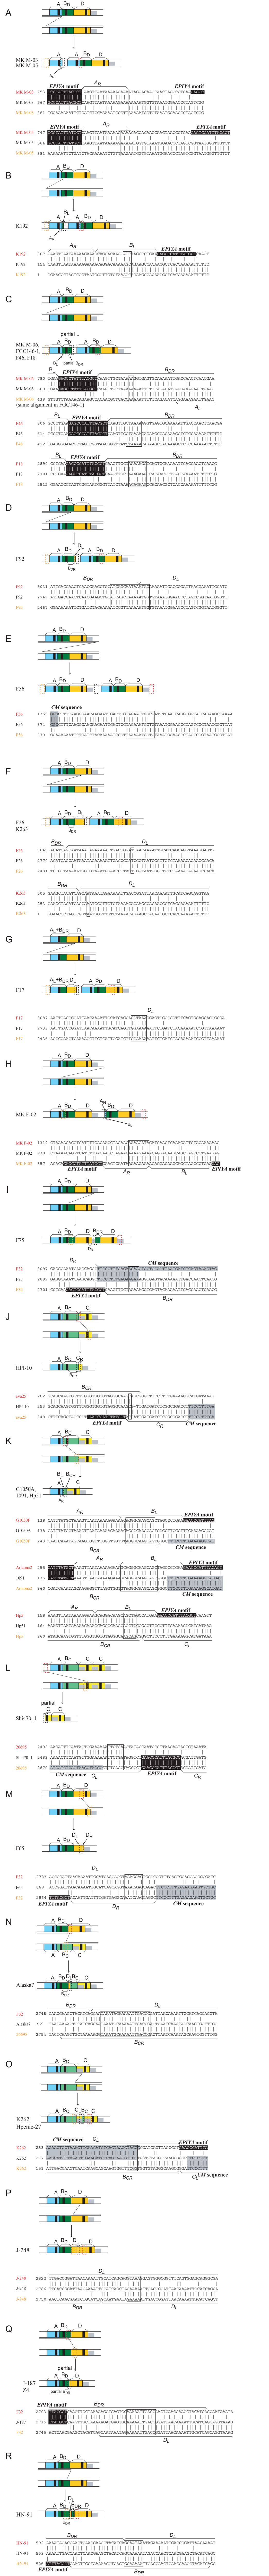

Supplement: pone.0023499.s004.pdf [file pone.0023499.s004.pdf]
